# Supplementary material
Source: PubMed Central journal article supplement (PMC5835019)
Supplement: mmc1.pdf [file mmc1.pdf]

**YMTHE, Volume 26**

**Supplemental Information**

**mRNA Vaccine with Antigen-Specific Checkpoint  
Blockade Induces an Enhanced Immune Response  
against Established Melanoma**

**Yuhua Wang, Lu Zhang, Zhengong Xu, Lei Miao, and Leaf Huang**

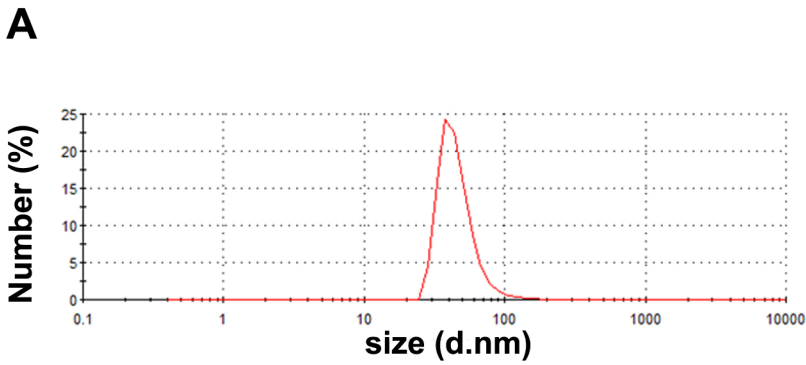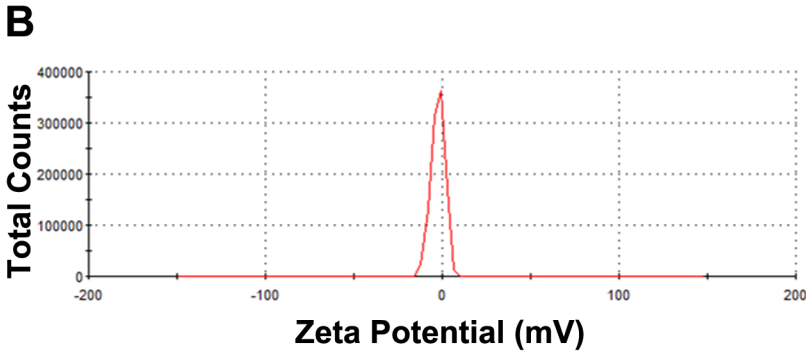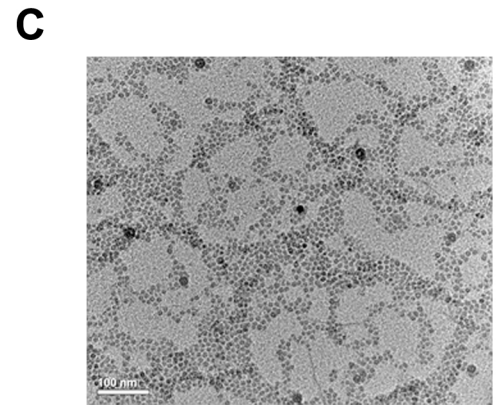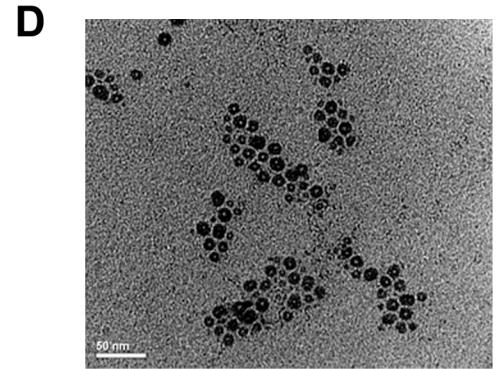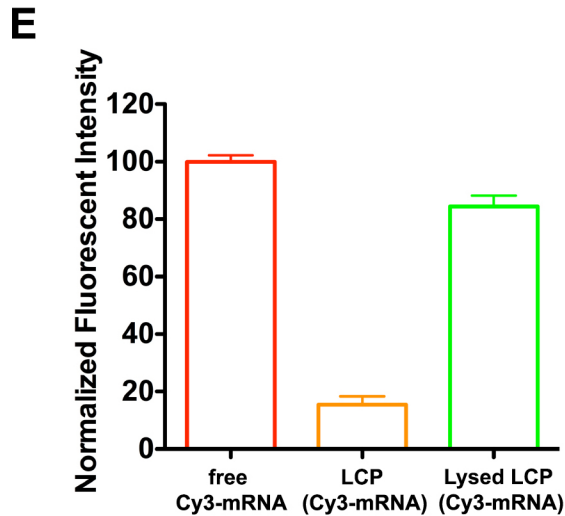

SI: **A** and **B**. Characterization of the size and surface charge of the LCP NPs using dynamic light scattering and laser Doppler electrophoresis. **C** and **D**: Image of transmission electron microscope of the LCP NPs after uranyl acetate staining. **E**: Quantitation of fluorescence quenching of fluorescently labeled mRNA entrapped in the LCP NPs.
